# Supplementary material for: Cortico-amygdala interaction determines the insular cortical neurons involved in taste memory retrieval
Source: PubMed Central journal article supplement (PMC7385890; doi:10.1186/s13041-020-00646-w), 2020-07-28
Supplement: 13041_2020_646_MOESM1_ESM.pdf [file 13041_2020_646_MOESM1_ESM.pdf]

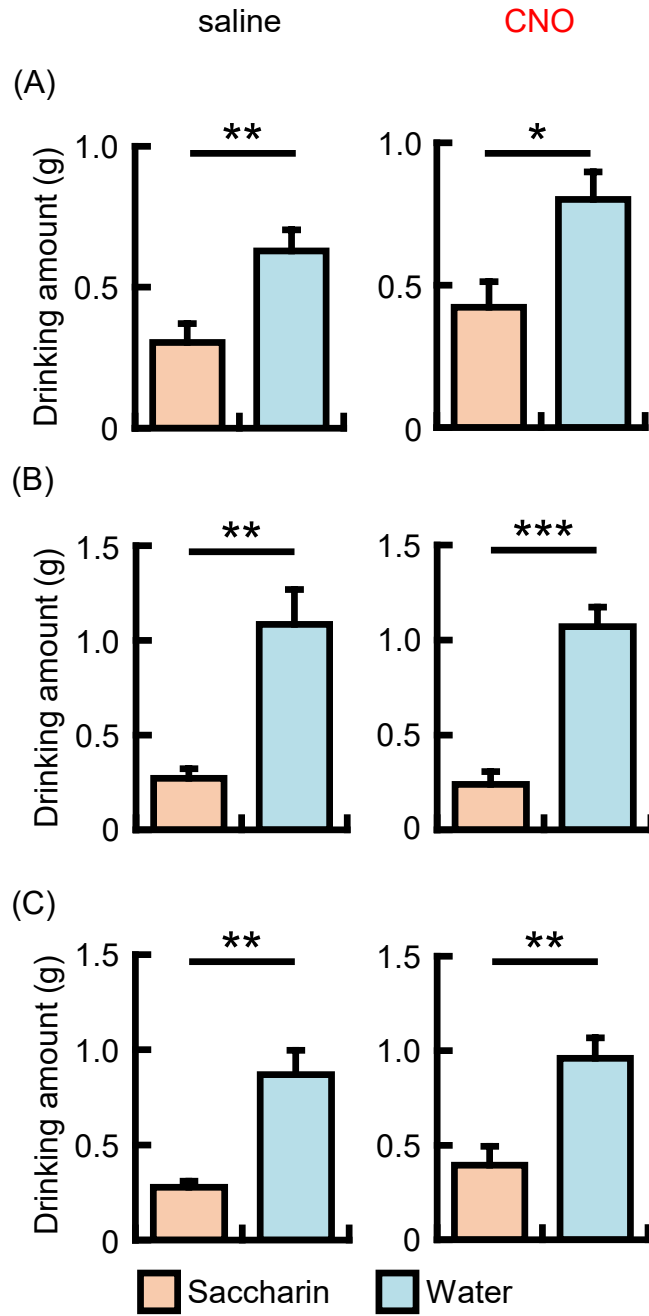

Supplementary Figure. 1

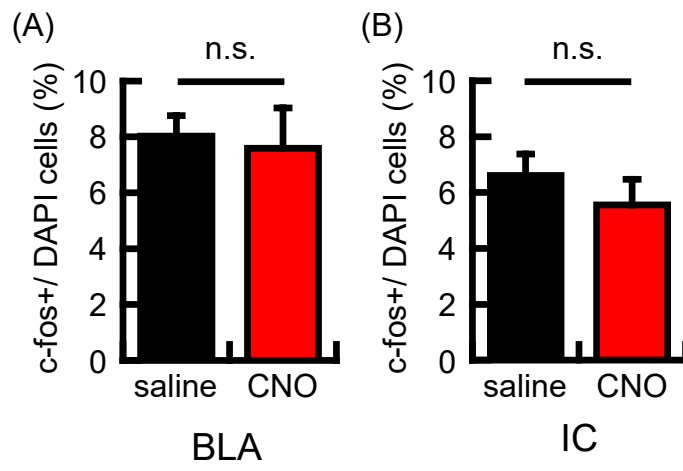

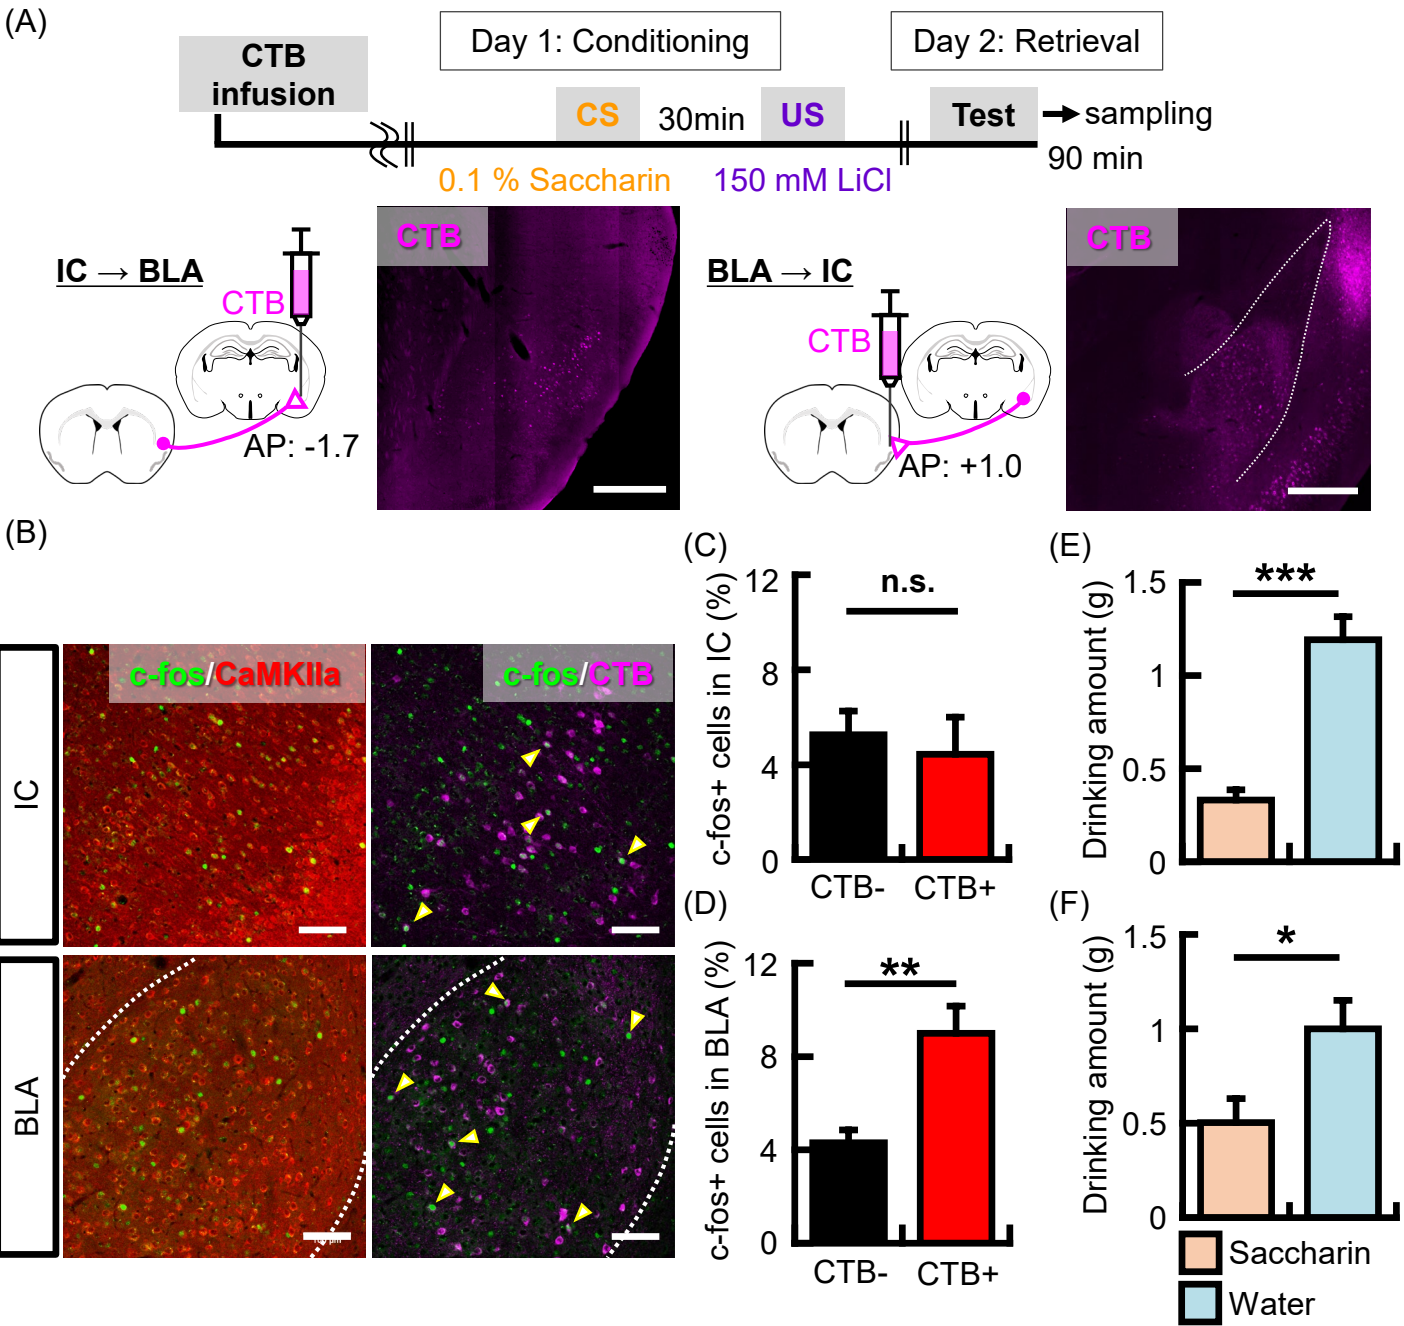

Supplementary Figure. 3

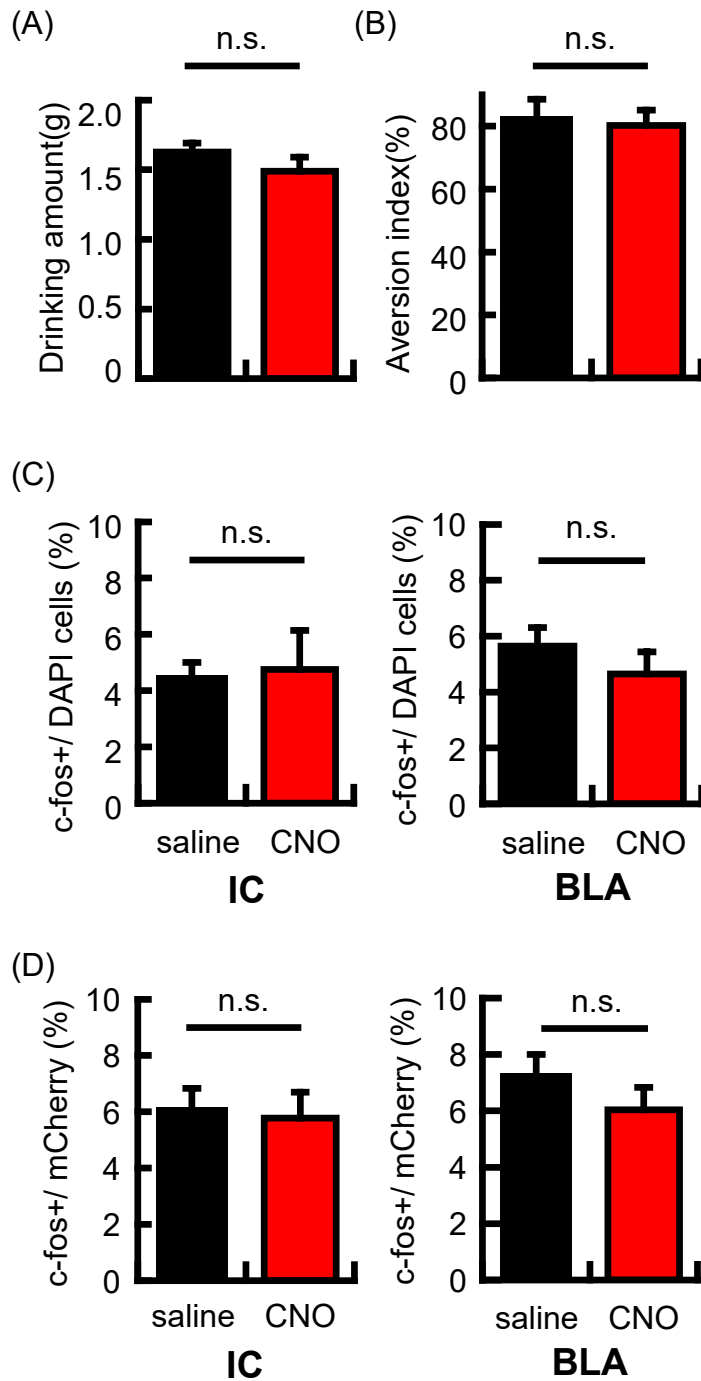

Supplementary Figure. 4
